# Supplementary material
Source: HighWire-hosted journal article supplement (https://erj.ersjournals.com/content/51/1/1701596)
Supplement: inline-supplementary-material-1 [file inline-supplementary-material-1.pdf]

# **The impact of digital health technologies on tuberculosis treatment:**

## **A systematic review**

Brian Kermu Ngwatu; Ntwali Placide Nsengiyumva; Olivia Oxlade; Benjamin Mappin-Kasirer; Nhat Linh Nguyen; Ernesto Jaramillo, Dennis Falzon, Kevin Schwartzman

### **Supplementary material**

Table S1: Search strategy

Table S2: Studies Excluded and Included After Review (n = 33 total)

Table S3: Assessment of bias of randomized trials included in the review

Figure S1: Risk of bias graph: review authors' assessments of each risk of bias item presented as percentages across all included randomized trials

Figure S2: Risk of bias summary: review authors' assessments of each risk of bias item for each included randomized trial

**Table S1: Search strategy**

|                                                                                                                                                                                                                                                                                                                                                                                                                                                                                                                                             |
|---------------------------------------------------------------------------------------------------------------------------------------------------------------------------------------------------------------------------------------------------------------------------------------------------------------------------------------------------------------------------------------------------------------------------------------------------------------------------------------------------------------------------------------------|
| <p><b>Terms to denote “TB disease</b></p> <p>Tuberculosis OR pulmonary tuberculosis OR Kochs disease OR Phthisis OR TB OR MTB OR drug resistant tuberculosis OR MDR TB OR XDR TB OR drug resistance TB OR DR TB OR latent TB OR LTBI OR DOTS OR directly observed treatment short course OR TB-DOTS OR anti-TB treatment OR Kochs disease</p>                                                                                                                                                                                               |
| <p><b>Terms to denote “digital technologies”</b></p> <p>Digital health OR telehealth OR eHealth OR mhealth OR telemedicine OR video health OR video recordings OR virtually observed treatment OR SMS OR reminders OR short message service OR text messages OR MMS OR multimedia messages OR MEMS OR medical electronic monitoring OR monitoring sensors OR monitoring devices OR video monitoring OR video conferencing OR Webcam OR videophone OR message reminders OR technology OR web based strategies OR health IT OR health ICT</p> |
| <p><b>Terms to denote “TB treatment outcomes”</b></p> <p>Adherence OR treatment adherence OR compliance OR TB treatment adherence OR TB treatment compliance OR medication adherence OR doses OR cure OR completion OR default OR costs OR death OR lost to follow up OR side effects OR adverse events OR mortality OR morbidity</p>                                                                                                                                                                                                       |

**Table S2: Studies Excluded and Included After Review (n = 33 total)**

| Ref                           | Stage and reason              | Author, Year     |                     | Title                                                                                                                                                                                                | Intervention                         |
|-------------------------------|-------------------------------|------------------|---------------------|------------------------------------------------------------------------------------------------------------------------------------------------------------------------------------------------------|--------------------------------------|
| <b>EXCLUDED STUDIES:</b>      |                               |                  |                     |                                                                                                                                                                                                      |                                      |
| Stage of exclusion and reason |                               |                  |                     |                                                                                                                                                                                                      |                                      |
| [1]                           | Abstract – protocol           | Green 2015       | Protocol            | Do clinical decision-support reminders for medical providers improve isoniazid preventative therapy prescription rates among HIV-positive adults?: Study protocol for a randomized controlled trial. | SMS                                  |
| [2]                           | Abstract – protocol           | Bediang 2014     | Protocol            | SMS reminders to improve the tuberculosis cure rate in developing countries (TB-SMS Cameroon): a protocol of a randomised control study                                                              | SMS                                  |
| [3]                           | Abstract - systematic review  | Nglazi 2013      | systematic review   | Mobile phone text messaging for promoting adherence to anti-tuberculosis treatment: a systematic review                                                                                              | SMS                                  |
| [4]                           | Abstract - systematic review  | Chen 2015        | systematic review   | Mobile phone based interventions for promoting adherence to tuberculosis treatment: a systematic review and meta-analysis                                                                            | Mobile phones                        |
| [5]                           | Abstract - systematic review  | Liu 2014         | systematic review   | Reminder systems to improve patient adherence to tuberculosis clinic appointments for diagnosis and treatment                                                                                        | Telephone call reminders and letters |
| [6]                           | Abstract - study not complete | Browne 2016      | Protocol            | Wireless Observed Therapy in Comparison to Directly Observed Therapy for the Treatment of Tuberculosis                                                                                               | MM                                   |
| [7]                           | Abstract - study not complete | Garfein 2016     | Protocol            | VDOT for monitoring adherence to LTBI treatment (VMALT)                                                                                                                                              | VOT                                  |
| [8]                           | Abstract – other endpoints    | Belknap 2010     | Conference abstract | Feasibility of a microchip-based system for electronically observed tuberculosis therapy                                                                                                             | MM                                   |
| [9]                           | Abstract - other endpoints    | Narasimhan 2014  | Original article    | A customized m-Health system for improving Tuberculosis treatment adherence and follow-up in south India.                                                                                            | Voice call based                     |
| [10]                          | Full text - other endpoints   | Lei 2013         | Original article    | Is the short messaging service feasible to improve adherence to tuberculosis care? A cross-sectional study                                                                                           | SMS                                  |
| [11]                          | Full text - other endpoints   | Windish 2015     | Original article    | Video observed therapy for multidrug-resistant tuberculosis: a qualitative study of patient perspectives                                                                                             | VDOT                                 |
| [12]                          | Full text - other endpoints   | Chaiyachati 2013 | Original article    | A Pilot Study of an mHealth Application for Healthcare Workers: Poor Uptake Despite High Reported Acceptability at a Rural South African Community-Based MDR-TB Treatment Program.                   | Mixed                                |

| Ref  | Stage and reason                | Author, Year      |                     | Title                                                                                                                                                                              | Intervention |
|------|---------------------------------|-------------------|---------------------|------------------------------------------------------------------------------------------------------------------------------------------------------------------------------------|--------------|
| [13] | Full text<br>- other endpoints  | Li<br>2011        | Original article    | A feasibility study on short messaging service (SMS) as a strategy to improve adherence to TB services.                                                                            | SMS          |
| [14] | Full text<br>- other endpoints  | Mohammed<br>2012  | Original article    | User engagement with and attitudes towards an interactive SMS reminder system for patients with tuberculosis.                                                                      | SMS          |
| [15] | Full text<br>- other endpoints  | Hoffman<br>2010   | Original article    | Mobile direct observation treatment for tuberculosis patients: a technical feasibility pilot using mobile phones in Nairobi, Kenya.                                                | VDOT         |
| [16] | Full text<br>- other endpoints  | Owiti<br>2012     | Conference abstract | Mobile phone text messaging reminders to aid adherence to tuberculosis care in Eldoret, Kenya                                                                                      | SMS          |
| [17] | Full text<br>– Qualitative      | Albino<br>2014    | Original article    | Perceptions and acceptability of short message services technology to improve treatment adherence amongst tuberculosis patients in Peru: a Focus Group Study.                      | SMS          |
| [18] | Full text<br>- Qualitative      | Belknap<br>2013   | Original article    | Feasibility of an Ingestible Sensor-Based System for Monitoring Adherence to Tuberculosis Therapy.                                                                                 | MM           |
| [19] | Full text<br>- Qualitative      | Person<br>2011    | Original article    | Text messaging for enhancement of testing and treatment for tuberculosis, human immunodeficiency virus, and syphilis: a survey of attitudes toward cellular phones and healthcare. | SMS          |
| [20] | Full text<br>- Qualitative      | Iribarren<br>2015 | Original article    | Qualitative Evaluation of a Text Messaging Intervention to Support Patients With Active Tuberculosis: Implementation Considerations                                                | SMS          |
| [21] | Full text<br>– Costing          | Krueger<br>2010   | Original article    | Videophone utilisation as an alternative to DOTS for tuberculosis                                                                                                                  | VOT          |
| [22] | Full text<br>- Costing          | Mirsaeidi<br>2015 | Original article    | Video directly observed therapy for treatment of tuberculosis is patient oriented and cost-effective                                                                               | VOT          |
| [23] | Full text<br>– latent TB study  | Lester<br>2015    | Protocol            | TB mHealth study - use of cell phones to improve compliance in patients on LTBI treatment                                                                                          | SMS          |
| [24] | Full text<br>- no control group | Garfein<br>2015   | Original article    | Feasibility of tuberculosis treatment monitoring by video directly observed therapy: A binational pilot study.                                                                     | VOT          |
| [25] | Full text<br>- no control group | Husler<br>2005    | Unpublished report  | Evaluation of the On Cue Compliance Service Pilot. Testing the Use of SMS Reminders in the Treatment of Tuberculosis in Cape Town, South Africa                                    | SMS          |
| [26] | Full text<br>- no control group | DeMaio<br>2001    | Original article    | The application of telemedicine technology to a directly observed therapy program for tuberculosis: A pilot project                                                                | VOT          |

| <b>INCLUDED STUDIES</b> |                         |                                                |                     |                                                                                                                                                                                         |
|-------------------------|-------------------------|------------------------------------------------|---------------------|-----------------------------------------------------------------------------------------------------------------------------------------------------------------------------------------|
| [27]                    | Full text<br>- included | Wade<br>2012                                   | Original<br>article | Home Videophones Improve Direct Observation in Tuberculosis Treatment: A Mixed Methods Evaluation. VOT                                                                                  |
| [28]                    | Full text<br>- included | Chuck<br>2016                                  | Original<br>article | Enhancing management of tuberculosis treatment with video directly observed therapy in New York City VOT                                                                                |
| [29]                    | Full text<br>- included | Broomhead<br>2012                              | Original<br>article | Retrospective return on investment analysis of an electronic treatment adherence device piloted in the Northern Cape Province MM                                                        |
| [30]                    | Full text<br>- included | Mohammed<br>2016                               | Original<br>article | Impact of a daily SMS medication reminder system on tuberculosis treatment outcomes: a randomized controlled trial SMS                                                                  |
| [31]                    | Full text<br>- included | Liu<br>2015                                    | Original<br>article | Effectiveness of Electronic Reminders to Improve Medication Adherence in Tuberculosis Patients: A Cluster-Randomised Trial MM & SMS                                                     |
| [32]                    | Full text<br>- included | Bediang<br>(Submitted for publication in 2017) | Original<br>article | SMS Reminders to Improve Tuberculosis Cure in Developing Countries (TB-SMS Cameroon): A Randomised Controlled Trial [Unpublished] SMS                                                   |
| [33]                    | Full text<br>- included | Iribarren<br>2013                              | Original<br>article | Text TB: A parallel design randomized control study to evaluate acceptance and feasibility of a patient driven mobile phone based intervention to support adherence to TB treatment SMS |

**Table S3: Assessment of bias of randomized trials included in the review**

| Bias                                                      | Reviewers' judgment | Reasons for judgment                                                                                                                                                                                                                                                                                                        |
|-----------------------------------------------------------|---------------------|-----------------------------------------------------------------------------------------------------------------------------------------------------------------------------------------------------------------------------------------------------------------------------------------------------------------------------|
| <b>Bediang (Submitted for publication in 2017) [32]</b>   |                     |                                                                                                                                                                                                                                                                                                                             |
| Random sequence generation (selection bias)               | Low risk            | This is a blinded, randomised controlled multicentre study carried out in Cameroon. Randomisation was carried out using a computer program by the main investigator.                                                                                                                                                        |
| Allocation concealment (selection bias)                   | Low risk            | The health personnel in the hospitals were not involved in the allocation of participants into groups                                                                                                                                                                                                                       |
| Blinding of participants and personnel (performance bias) | High risk           | Both participants and personnel were aware of the intervention                                                                                                                                                                                                                                                              |
| Blinding of outcome assessment (detection bias)           | High risk           | Assessors were aware of the intervention received by study participants                                                                                                                                                                                                                                                     |
| Incomplete outcome data (attrition bias)                  | Low risk            | There was a low rate of attrition                                                                                                                                                                                                                                                                                           |
| Selective reporting (reporting bias)                      | Low risk            | The authors reported results in the way they had originally proposed in the protocols.                                                                                                                                                                                                                                      |
| <b>Iribarren 2013 [33]</b>                                |                     |                                                                                                                                                                                                                                                                                                                             |
| Random sequence generation                                | Low risk            | Patients newly diagnosed with TB who were 18 or older, and had mobile phone access were recruited and randomized to usual care plus either medication calendar or text messaging intervention for the first two months of treatment.                                                                                        |
| Allocation concealment                                    | Low risk            | Eligible participants were randomized in a 1:1 allocation ratio in blocks of 10. Physicians were not made aware of the group allocation of their patient unless the patient informed them.                                                                                                                                  |
| Performance bias                                          | High risk           | Both participants and personnel were aware of the intervention                                                                                                                                                                                                                                                              |
| Detection bias                                            | Unclear risk        | Not documented in the original paper                                                                                                                                                                                                                                                                                        |
| Attrition bias                                            | High risk           | 47% of calendars were not returned for analysis                                                                                                                                                                                                                                                                             |
| Reporting bias                                            | Unclear risk        | We did not have access to the protocol                                                                                                                                                                                                                                                                                      |
| <b>Liu 2015 [31]</b>                                      |                     |                                                                                                                                                                                                                                                                                                                             |
| Random sequence generation                                | Low risk            | 36 clusters were randomised to the four arms by rural/urban stratum and restricted such that each province had at least two clusters in each arm. From 5,000 randomly generated acceptable allocations, one was chosen at random as the final allocation                                                                    |
| Allocation concealment                                    | Low risk            |                                                                                                                                                                                                                                                                                                                             |
| Performance bias                                          | High risk           | Both participants and personnel were aware of the intervention                                                                                                                                                                                                                                                              |
| Detection bias                                            | Unclear risk        | Not documented in the original paper                                                                                                                                                                                                                                                                                        |
| Attrition bias                                            | Low risk            | Five patients transferred to another clinic and one patient had missing outcomes                                                                                                                                                                                                                                            |
| Reporting bias                                            | Low risk            | The primary endpoint was a quantitative measure of the proportion of months on TB treatment where at least 3 doses were missed in a month                                                                                                                                                                                   |
| <b>Mohammed 2016 [30]</b>                                 |                     |                                                                                                                                                                                                                                                                                                                             |
| Random sequence generation                                | Low risk            | Patients were randomized through an electronic randomization process at the time of enrolment, to prevent personal bias from contaminating the randomization process. Patients were randomized into either the control arm or the Zindagi SMS arm of the study using programs on the clinic representatives' mobile phones. |
| Allocation concealment                                    | Low risk            | Participants were informed of their randomization status but it was not shared with their treating clinics by the study representatives.                                                                                                                                                                                    |
| Performance bias                                          | High risk           | Both participants and personnel were aware of the intervention                                                                                                                                                                                                                                                              |
| Detection bias                                            | Unclear risk        | Not documented in the original paper                                                                                                                                                                                                                                                                                        |
| Attrition bias                                            | Low risk            |                                                                                                                                                                                                                                                                                                                             |
| Reporting bias                                            | Low risk            | Treatment outcomes for TB patients included cure, treatment complete, treatment failure, died, transfer out, or default.                                                                                                                                                                                                    |

**Figure S1: Risk of bias graph: review authors' assessments of each risk of bias item presented as percentages across all included randomized trials**

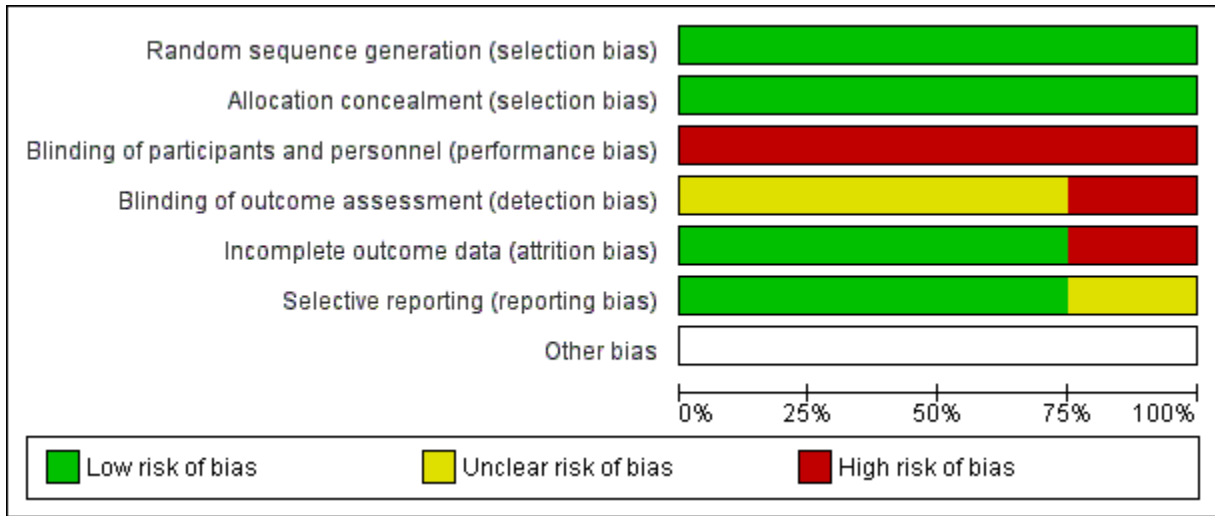

**Figure S2: Risk of bias summary: review authors' assessments of each risk of bias item for each included randomized trial**

|                  | Random sequence generation (selection bias) | Allocation concealment (selection bias) | Blinding of participants and personnel (performance bias) | Blinding of outcome assessment (detection bias) | Incomplete outcome data (attrition bias) | Selective reporting (reporting bias) | Other bias |
|------------------|---------------------------------------------|-----------------------------------------|-----------------------------------------------------------|-------------------------------------------------|------------------------------------------|--------------------------------------|------------|
| Bediang G 2017   | +                                           | +                                       | -                                                         | -                                               | +                                        | +                                    |            |
| Iribarren S 2013 | +                                           | +                                       | -                                                         | ?                                               | -                                        | ?                                    |            |
| Liu 2015         | +                                           | +                                       | -                                                         | ?                                               | +                                        | +                                    |            |
| Mohammed 2017    | +                                           | +                                       | -                                                         | ?                                               | +                                        | +                                    |            |

## References

1. Green EP, Catalani C, Diero L, Carter EJ, Gardner A, Ndwiga C, Keny A, Owiti P, Israelski D, Biondich P. Do clinical decision-support reminders for medical providers improve isoniazid preventative therapy prescription rates among HIV-positive adults?: study protocol for a randomized controlled trial. *Trials*. 2015;16(1):141
2. Bediang G, Stoll B, Elia N, Abena J-L, Nolna D, Chastonay P, Geissbuhler A. SMS reminders to improve the tuberculosis cure rate in developing countries (TB-SMS Cameroon): a protocol of a randomised control study. *Trials*. 2014;15(1):35
3. Nglazi MD, Bekker L-G, Wood R, Hussey GD, Wiysonge CS. Mobile phone text messaging for promoting adherence to anti-tuberculosis treatment: a systematic review. *BMC infectious diseases*. 2013;13(1):566
4. Chen S, Pan Y, Qu Y, Liu Z, Yao L, Xiang L. Mobile phone based interventions for promoting adherence to tuberculosis treatment: a systematic review and meta-analysis. *The Lancet*. 2015;386:S29
5. Liu Q, Abba K, Alejandria MM, Sinclair D, Balanag VM, Lansang MAD. Reminder systems to improve patient adherence to tuberculosis clinic appointments for diagnosis and treatment. *Cochrane Database of Systematic Reviews*. 2014;10.1002/14651858.CD006594.pub3(11).<http://dx.doi.org/10.1002/14651858.CD006594.pub3>
6. Browne S, Haubrich R, Moser K, Tucker A, Vaida F, Peloquin C, Benson C. Wirelessly observed therapy in comparison to directly observed therapy for the treatment of tuberculosis. *ClinicalTrials.gov* [database] Bethesda (MD): National Library of Medicine (US). 2016(<https://clinicaltrials.gov/ct2/show/study/NCT01960257#contacts>).<http://clinicaltrials.gov/ct2/show/NCT01960257>
7. Garfein R. VDOT for Monitoring Adherence to LTBI Treatment (VMALT). *ClinicalTrials.gov* [database] Bethesda (MD): National Library of Medicine (US). 2016(<https://clinicaltrials.gov/ct2/show/NCT02641106>).<https://clinicaltrials.gov/ct2/show/NCT02641106>
8. Belknap R, Luna L, Reves R, Turk L, Weiss S, Au-Yeung K, Moon G, Karplus E, editors. Feasibility of a microchip-based system for electronically observed tuberculosis therapy. *Proceedings of the American Thoracic Society International Conference*; 2010 [https://doi.org/10.1164/ajrccm-conference.2010.181.1\\_MeetingAbstracts.A5462](https://doi.org/10.1164/ajrccm-conference.2010.181.1_MeetingAbstracts.A5462).
9. Narasimhan P, Bakshi A, Kittusami S, Prashant S, Mathai D, Bakshi K, MacIntyre CR, Ray P. A customized m-Health system for improving Tuberculosis treatment adherence and follow-up in south India. *Health and Technology*. 2014;4(1):1-10
10. Lei X, Liu Q, Wang H, Tang X, Li L, Wang Y. Is the short messaging service feasible to improve adherence to tuberculosis care? A cross-sectional study. *Transactions of the Royal Society of Tropical Medicine and Hygiene*. 2013;107(10):666-8
11. Windish P, Luchenski S, Hall J, Appleby Y, Possas L, Hemming S, Story A. Video observed therapy for multidrug-resistant tuberculosis: a qualitative study of patient perspectives. *The Lancet*. 2015;386:S78
12. Chaiyachati KH, Loveday M, Lorenz S, Lesh N, Larkan L-M, Cinti S, Friedland GH, Haberer JE. A pilot study of an mHealth application for healthcare workers: poor uptake despite high reported acceptability at a rural South African community-based MDR-TB treatment program. *PLoS One*. 2013;8(5):e64662
13. Li L, Lei X, Liu Q, Wang H, Tang X, Wang Y. A feasibility study on short messaging service (SMS) as a strategy to improve adherence to TB services. *Chinese Journal of Evidence-Based Medicine*. 2011:631-5.[http://caod.oriprobe.com/articles/27472030/A\\_Feasibility\\_Study\\_on\\_Short\\_Messaging\\_Service\\_SMS\\_as\\_a\\_Strategy\\_to\\_.htm](http://caod.oriprobe.com/articles/27472030/A_Feasibility_Study_on_Short_Messaging_Service_SMS_as_a_Strategy_to_.htm)
14. Mohammed S, Siddiqi O, Ali O, Habib A, Haqqi F, Kausar M, Khan AJ. User engagement with and attitudes towards an interactive SMS reminder system for patients with tuberculosis. *Journal of telemedicine and telecare*. 2012;18(7):404-8
15. Hoffman JA, Cunningham JR, Suleh AJ, Sundsmo A, Dekker D, Vago F, Munly K, Igonya EK, Hunt-Glassman J. Mobile direct observation treatment for tuberculosis patients: a technical feasibility pilot using mobile phones in Nairobi, Kenya. *American journal of preventive medicine*. 2010;39(1):78-80
16. Owiti P, Gardner A, Szkwarko D, Diero L, Carter E, editors. Mobile phone text messaging reminders to aid adherence to tuberculosis care in Eldoret, Kenya. 43rd World Conference on Lung Health of The Union, Kuala Lumpur, Malaysia; 2012
17. Albino S, Tabb KM, Requena D, Egoavil M, Pineros-Leano MF, Zunt JR, García PJ. Perceptions and acceptability of short message services technology to improve treatment adherence amongst tuberculosis patients in Peru: a focus group study. *PloS one*. 2014;9(5):e95770



18. Belknap R, Weis S, Brookens A, Au-Yeung KY, Moon G, DiCarlo L, Reves R. Feasibility of an ingestible sensor-based system for monitoring adherence to tuberculosis therapy. *PloS one*. 2013;8(1):e53373. [https://doi.org/10.1164/ajrccm-conference.2010.181.1\\_MeetingAbstracts.A5462](https://doi.org/10.1164/ajrccm-conference.2010.181.1_MeetingAbstracts.A5462)
19. Person AK, Blain ML, Jiang H, Rasmussen PW, Stout JE. Text messaging for enhancement of testing and treatment for tuberculosis, human immunodeficiency virus, and syphilis: a survey of attitudes toward cellular phones and healthcare. *Telemedicine and e-Health*. 2011;17(3):189-95
20. Iribarren SJ, Sward KA, Beck SL, Pearce PF, Thurston D, Chirico C. Qualitative Evaluation of a Text Messaging Intervention to Support Patients With Active Tuberculosis: Implementation Considerations. *JMIR mHealth and uHealth*. 2015;3(1)
21. Krueger K, Ruby D, Cooley P, Montoya B, Exarchos A, Djojonegoro B, Field K. Videophone utilization as an alternative to directly observed therapy for tuberculosis. *The International Journal of Tuberculosis and Lung Disease*. 2010;14(6):779-81
22. Mirsaiedi M, Farshidpour M, Banks-Tripp D, Hashmi S, Kujoth C, Schraufnagel D. Video directly observed therapy for treatment of tuberculosis is patient-oriented and cost-effective. *European Respiratory Journal*. 2015:ERJ-00110-2015
23. Lester R. TB mHealth Study - Use of Cell Phones to Improve Compliance in Patients on LTBI Treatment. *ClinicalTrials.gov* [database] Bethesda (MD): National Library of Medicine (US). 2015(<https://clinicaltrials.gov/ct2/show/NCT01549457>). <https://clinicaltrials.gov/ct2/show/NCT01549457>
24. Garfein R, Collins K, Munoz F, Moser K, Cerecer-Callu P, Raab F, Rios P, Flick A, Zuniga M, Cuevas-Mota J. Feasibility of tuberculosis treatment monitoring by video directly observed therapy: a binational pilot study. *The International Journal of Tuberculosis and Lung Disease*. 2015;19(9):1057-64
25. Hüsler J. Evaluation of the On Cue Compliance Service Pilot: Testing the use of SMS reminders in the treatment of tuberculosis in Cape Town, South Africa. *Bridges.org report 2005*, 1-41. [http://www.kiwanja.net/database/document/report\\_tb\\_compliance.pdf](http://www.kiwanja.net/database/document/report_tb_compliance.pdf)
26. DeMaio J, Schwartz L, Cooley P, Tice A. The application of telemedicine technology to a directly observed therapy program for tuberculosis: a pilot project. *Clinical infectious diseases*. 2001;33(12):2082-4
27. Wade VA, Karnon J, Elliott JA, Hiller JE. Home videophones improve direct observation in tuberculosis treatment: a mixed methods evaluation. *PLoS One*. 2012;7(11):e50155
28. Chuck C, Robinson E, Macaraig M, Alexander M, Burzynski J. Enhancing management of tuberculosis treatment with video directly observed therapy in New York City. *The International Journal of Tuberculosis and Lung Disease*. 2016;20(5):588-93
29. Broomhead S, Mars M. Retrospective return on investment analysis of an electronic treatment adherence device piloted in the Northern Cape Province. *Telemedicine and e-Health*. 2012;18(1):24-31. <http://online.liebertpub.com/doi/pdfplus/10.1089/tmj.2011.0143>
30. Mohammed S, Glennerster R, Khan AJ. Impact of a Daily SMS Medication Reminder System on Tuberculosis Treatment Outcomes: A Randomized Controlled Trial. *PloS one*. 2016;11(11):e0162944. <https://www.ncbi.nlm.nih.gov/pmc/articles/PMC5089745/pdf/pone.0162944.pdf>
31. Liu X, Lewis JJ, Zhang H, Lu W, Zhang S, Zheng G, Bai L, Li J, Li X, Chen H. Effectiveness of Electronic Reminders to Improve Medication Adherence in Tuberculosis Patients: A Cluster-Randomised Trial. *PLoS Med*. 2015;12(9):e1001876. <https://www.ncbi.nlm.nih.gov/pmc/articles/PMC4570796/pdf/pmed.1001876.pdf>
32. Bediang G, Stoll B, Elia N, Abena J-L, Nolna D, Chastonay P, Geissbuhler A. SMS Reminders to Improve Tuberculosis Cure in Developing Countries (TB-SMS Cameroon): A Randomised Control Trial. *Trials*. 2014;BioMed Central. <http://www.ncbi.nlm.nih.gov/pmc/articles/PMC3902069/>
33. Iribarren S, Beck S, Pearce PF, Chirico C, Etchevarria M, Cardinale D, Rubinstein F. TextTB: A Mixed Method Pilot Study Evaluating Acceptance, Feasibility, and Exploring Initial Efficacy of a Text Messaging Intervention to Support TB Treatment Adherence. *Tuberculosis Research and Treatment*. 2013;2013:12. <http://dx.doi.org/10.1155/2013/349394>
